# Supplementary material
Source: publisher site journal article supplement (https://www.dovepress.com/article/224805)
Supplement: Supplementary file 1 [file get_supplementary_file.php]

Supporting Information

**ADDITIONAL FIGURES**


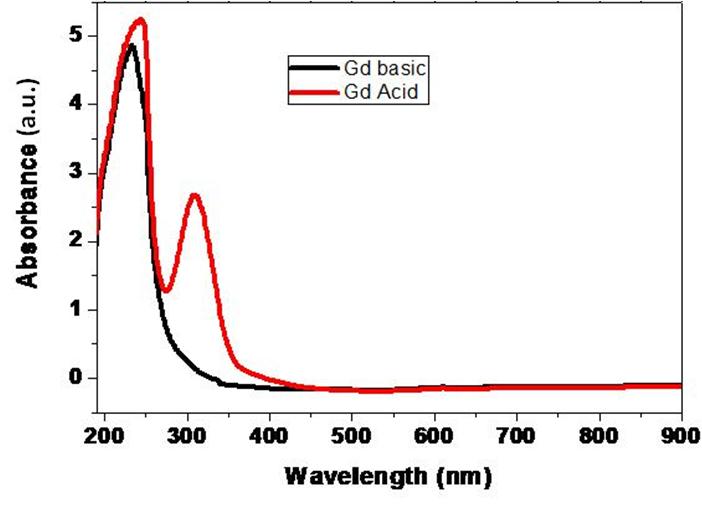


**Figure S1:** UV Vis spectra of Gd -Au complex under basic (black line i.e. Gd basic) and acidic (red line i.e. Gd acid) conditions in aqueous solution.

**Figure S2.** Changes in the UV-Vis absorption spectra of Gd@ AuNPs (NP1 NP2 NP3) when incubated in cell culture media (DMEM + 10% FBS) respectively up to 72h. The absorption peak of nanoparticles was unchanged and the size and shape were not compromised


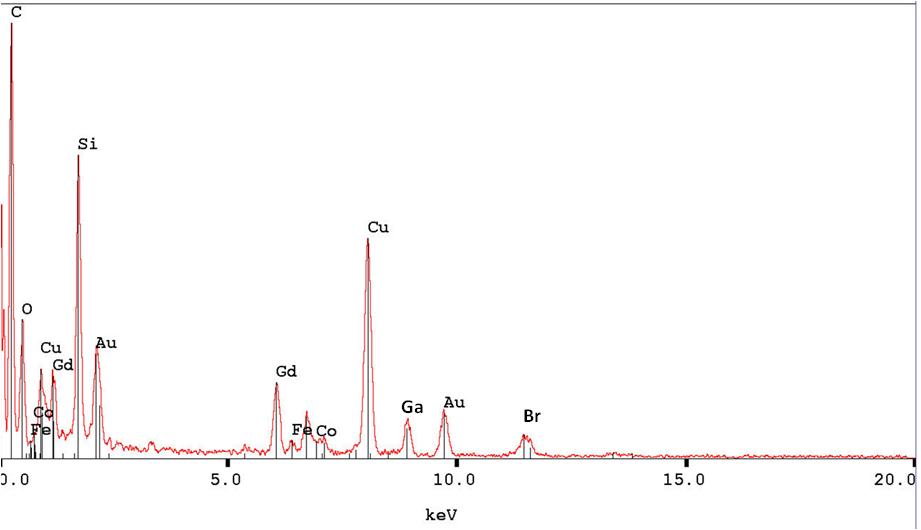


**Figure S3:** EDX microanalysis of Gd@AuNPs


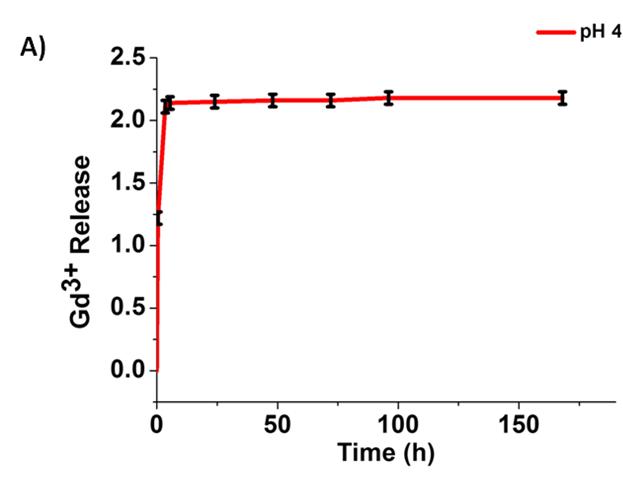


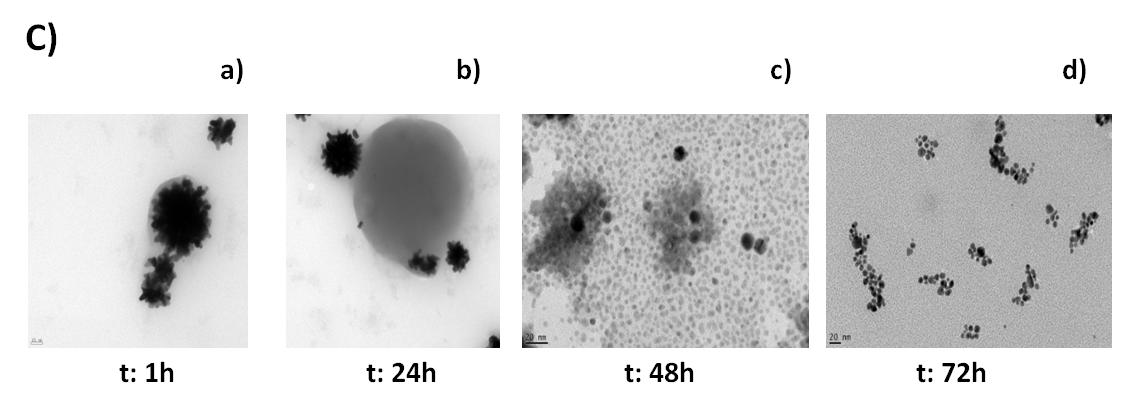


**Figure S4: (A)** Percentage (%) of Gd (III) as Au-@Gd complex , released from NP3 overtime in PBS (37 °C) at pH = 4.0 (red dots).  **(B)** Variations of the Raman band intensity at 260 cm-1versus time. NP3 was incubated in PBS (37 °C) at pH 4.0 ; **(C)** TEM images and conformational shape modifications under PBS (37 °C) .


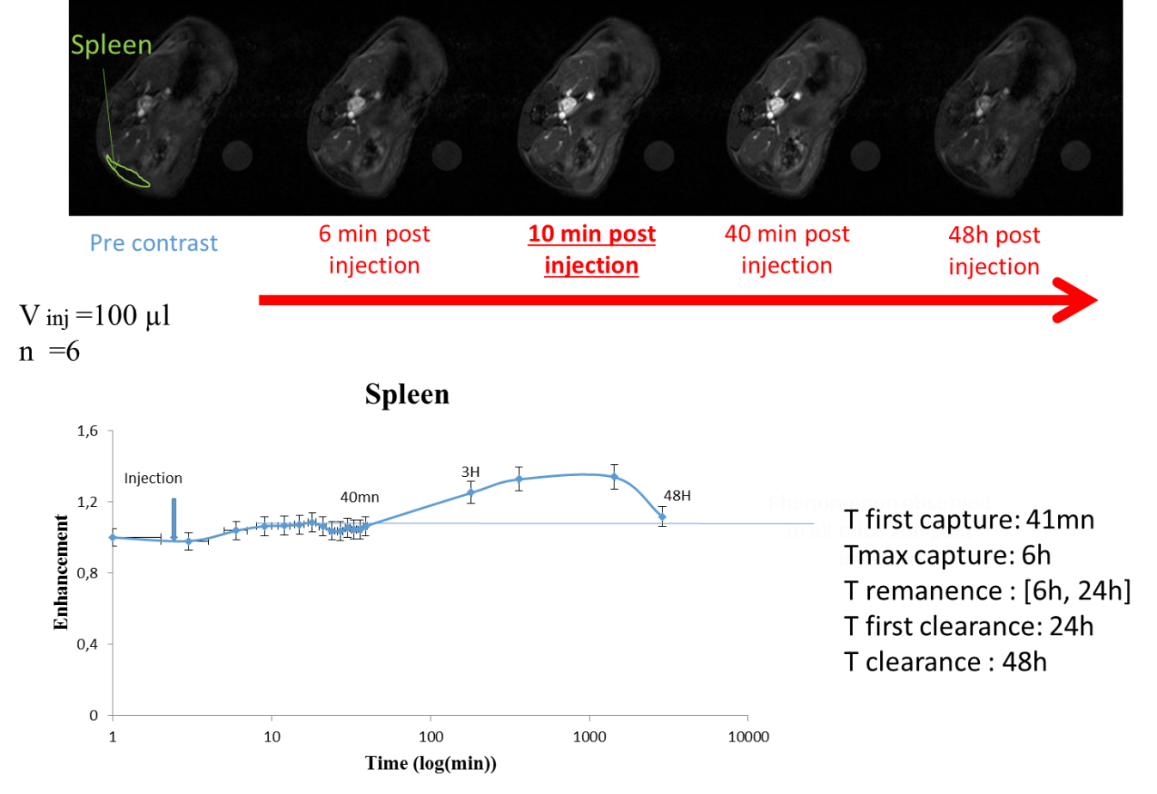


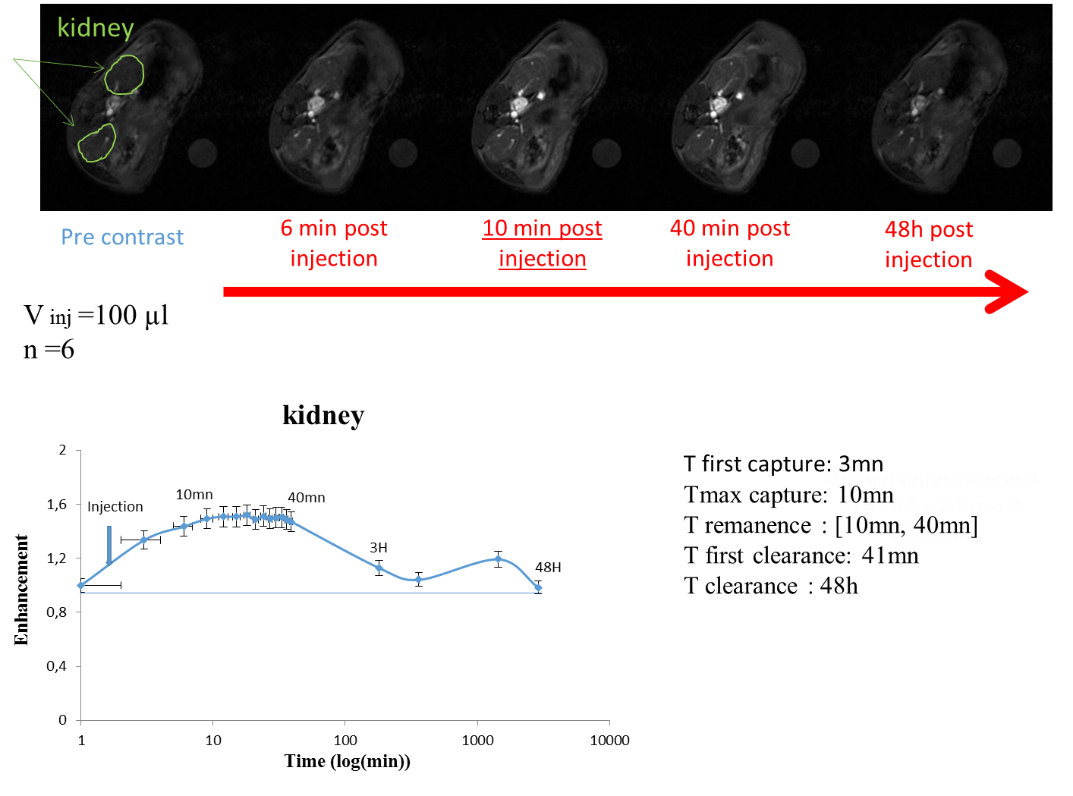


**Figure S5**: Spleen and kidney organs biodistribution recorded by In vivo DCE MRI at 7T.

**ADDITIONAL TABLES**

**Table S1:** z-potential and hydrodynamic diameter of NP1, NP2, NP3.

| **Synthetic product** | **Zeta potential**  **(mV)** | **Hydrodynamic diameter**  **(nm)** | **PdI** |
| --- | --- | --- | --- |
| NP1 | -25 ± 2 | 20 ± 2 | 0.3±2 |
| NP2 | -20 ± 1 | 40± 2 | 0.3±2 |
| NP3 | 23 ± 1 | 60± 2 | 0.3±2 |
